# Supplementary material
Source: PubMed Central journal article supplement (PMC7028488)
Supplement: NIHMS1064558-supplement-1.pdf [file NIHMS1064558-supplement-1.pdf]

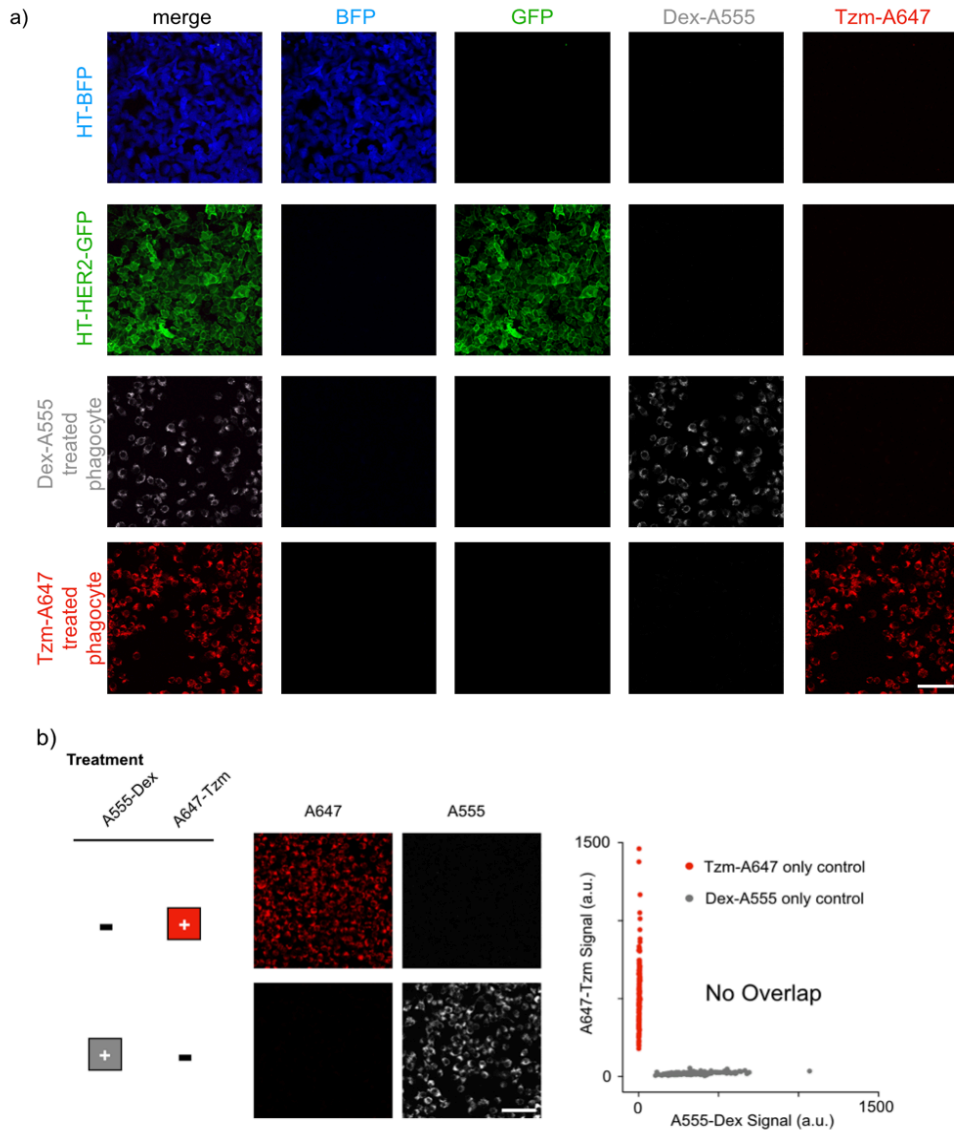

**Supplementary Fig. 1. No fluorescent bleed-through was observed with fluorophore used.** HT-BFP cells, HT-HER2-GFP cells, Dex-A555 treated Raw phagocytes, or Tzm-A647 treated Raw phagocytes were imaged for single-fluorophore control experiments. (a) Representative fluorescent images of single-fluorophore control showing no fluorescent bleed through with microscopy setting employed. (b) Quantification of fluorescent intensities in A555 and A647 channels in Tzm-A647 and Dex-A555 control samples showing no signal overlap between these two adjacent imaging channels. Scale Bars=50  $\mu$ m.

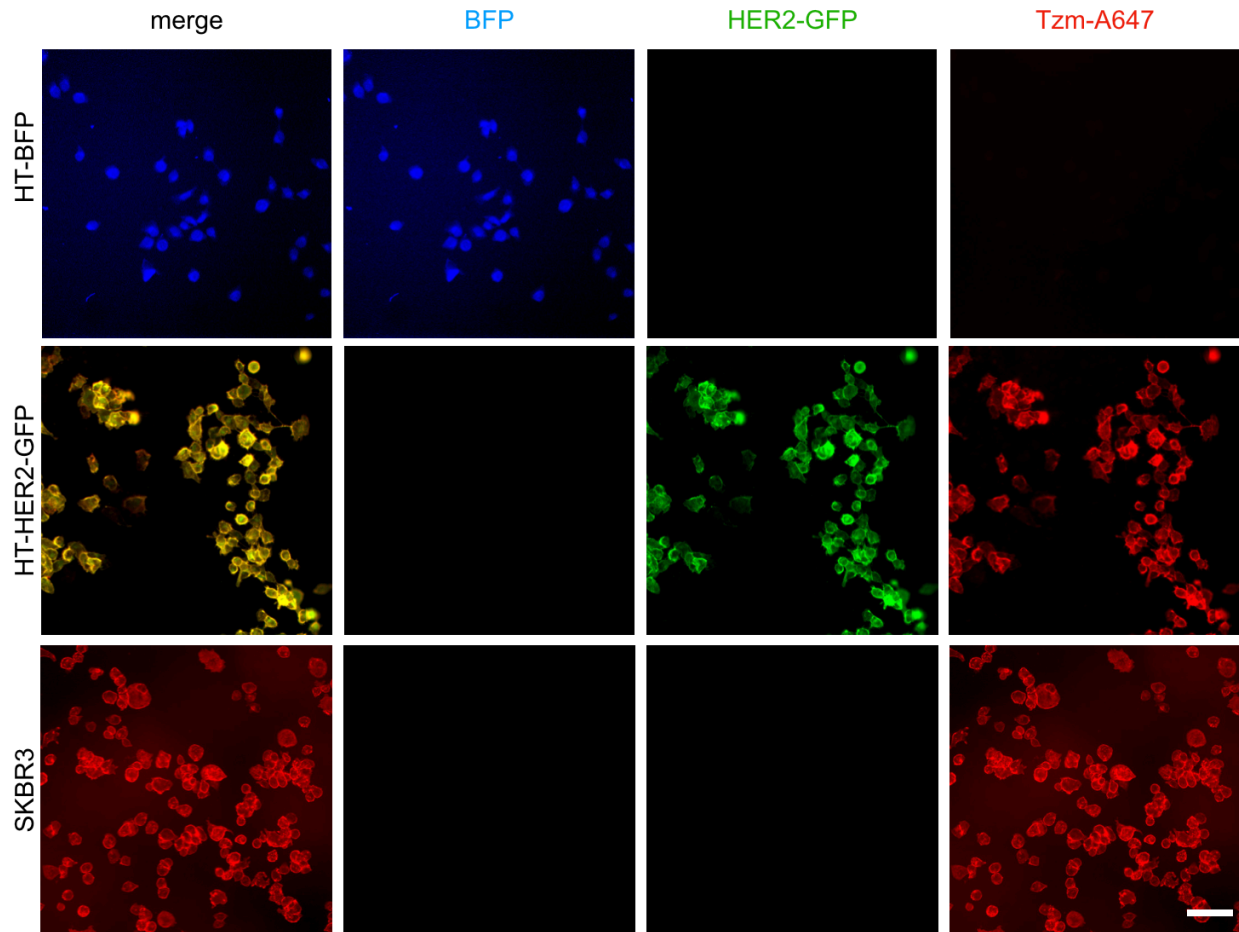

**Supplementary Fig. 2. Tzm-A647 binds selectively to cells expressing HER2.**

Representative fluorescent microscopy showing selective Tzm accumulation on HT1080 cells over-expressing HER2-GFP fusion protein (HT-HER2-GFP, middle) and SKBR3 (bottom) but not HER2-negative HT-BFP cells. Scale bar=50  $\mu$ m.

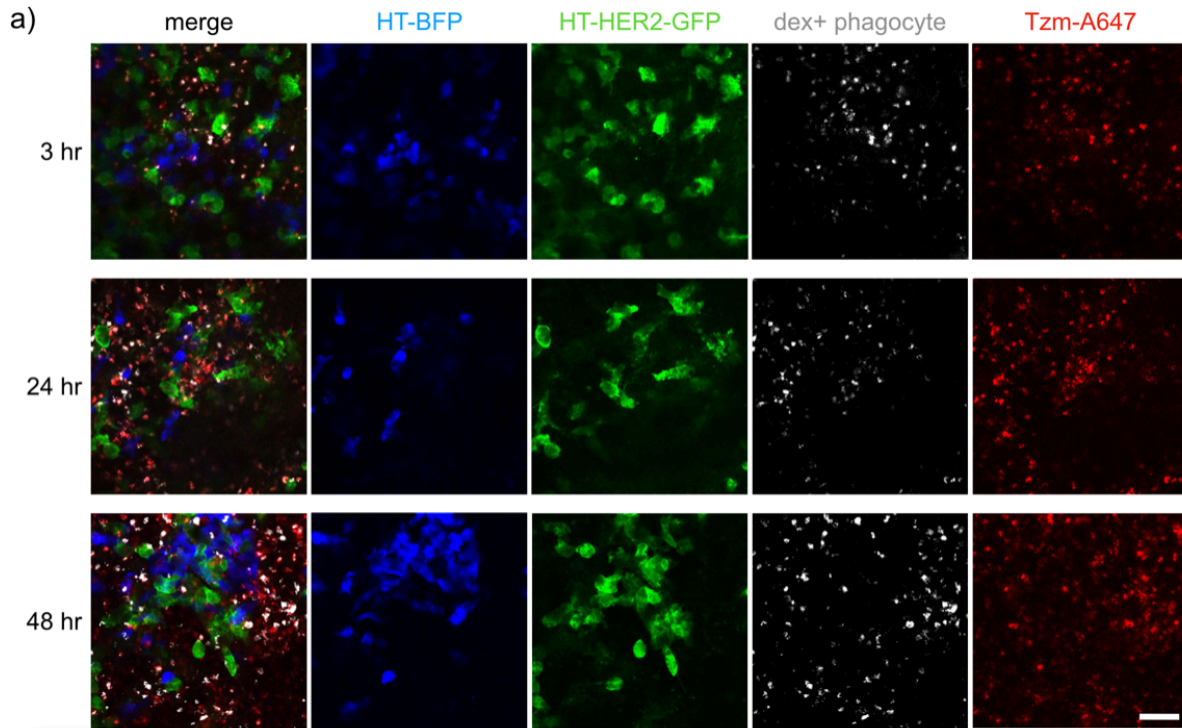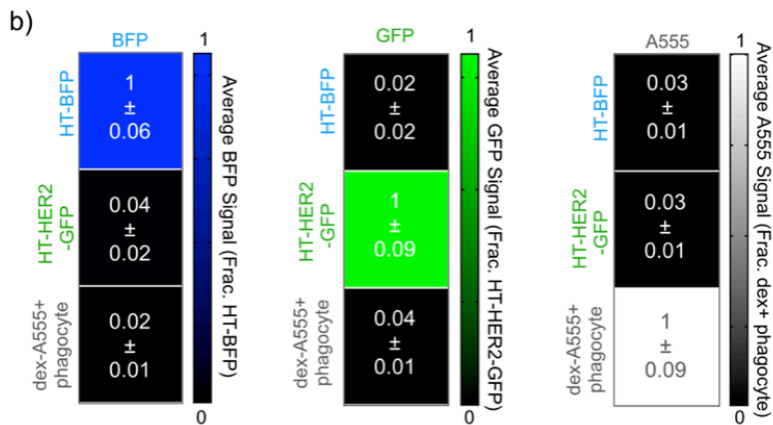

**Supplementary Fig. 3. Tzm-A647 predominantly accumulates in phagocytes and HER2+ tumor cells.** a) Representative *in vivo* images (3 h, 24 h, and 48 h) of Tzm-A647 biodistribution in mosaic tumors at single-cell resolution (Scale bar=50  $\mu$ m). b) Quantification of fluorescent intensity in BFP, GFP, and A555 channels for HT-BFP, HT-HER2-GFP, and dex-A555+ phagocytes (data are mean  $\pm$  s.e.m form n>50 cells).

## HT-BFP

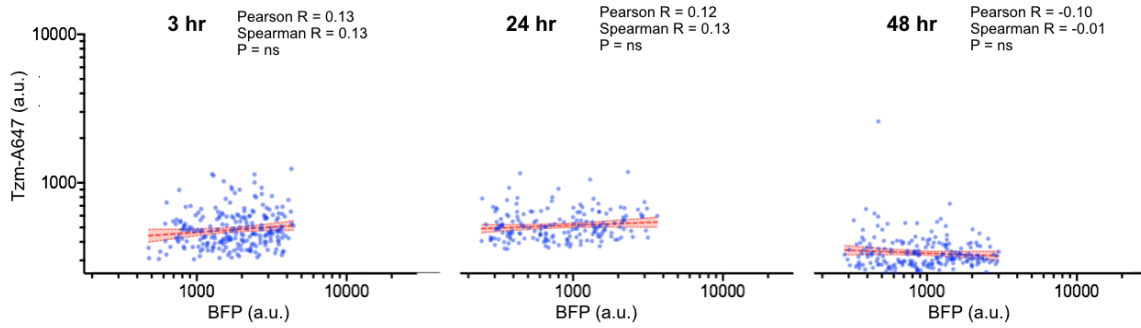

**Supplementary Fig.4. BFP expression does not correlate with Tzm association in the mosaic tumor.** BFP fluorescence intensity was plotted against Tzm uptake across individual HT-BFP cells in the mosaic tumor model (Spearman and Pearson correlation R and P values reported,  $n > 180$  cells).

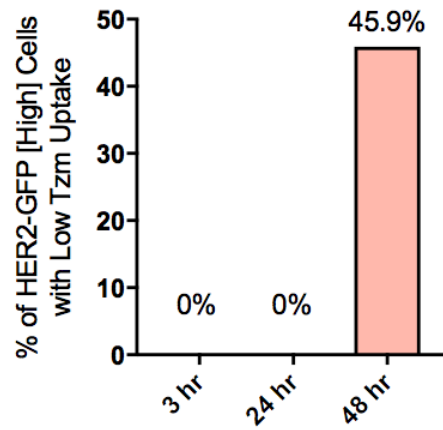

**Supplementary Fig.5. Cells with high HER2-GFP expression but low Tzm binding are only observed at 48 h post-treatment with Tzm.** The percent of cells with high HER2-GFP expression (defined as top 20% of expression) that are low in Tzm uptake (defined as bottom 20% of Tzm signals) was calculated across n = 15-50 cells at 3 time-points.

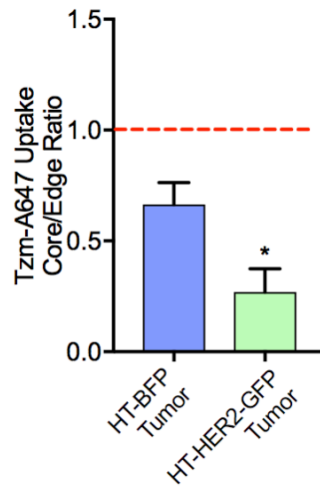

**Supplementary Fig.6. Tzm-A647 accumulates at the tumor edge of both HER2+ and HER2- tumors.** Quantification of the ratio of Tzm-A647 intensity at the core to the intensity at the edge of the tumor from Fig. 6C (mean  $\pm$  s.e.m from 6 tumors, \*:  $p < 0.05$ , t-test).

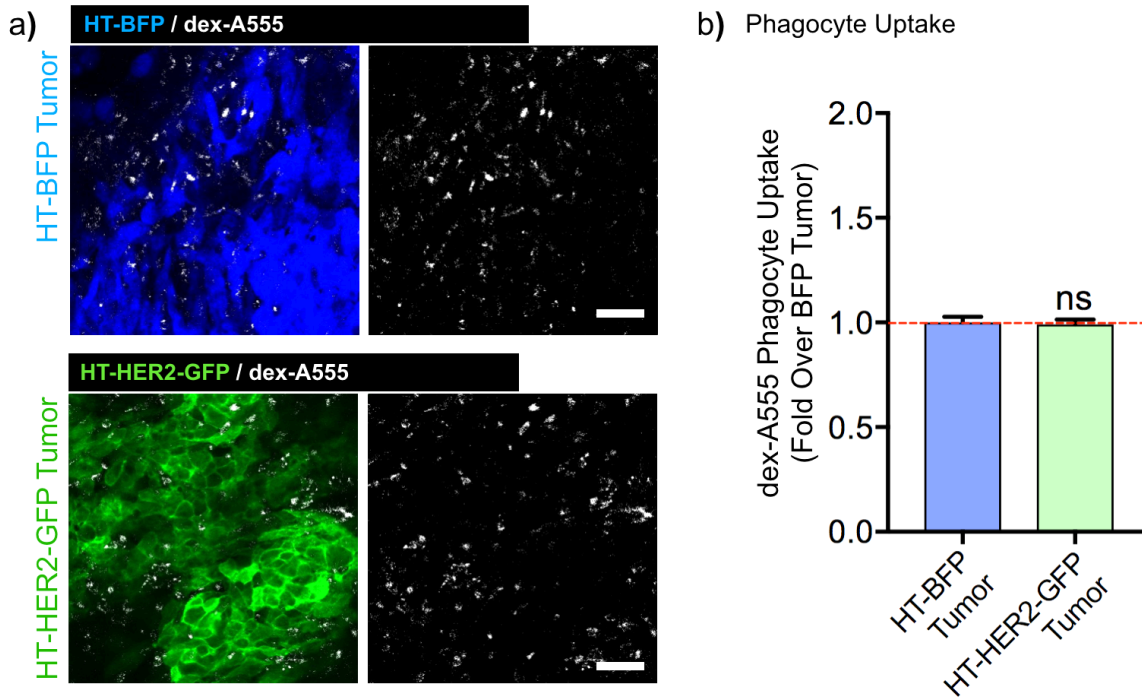

**Supplementary Fig.7. HER2 expression on tumor cells does not impact uptake of dextran-A555 by neighboring phagocytes. (a-b)** The uptake of dextran-A555 in tumor-associated phagocytes was compared between uniformly HER2+ and HER2- tumors, corresponding to the experimental scheme in Fig. 6a, and is shown as representative confocal microscopy (a; scale bars=50  $\mu$ m) and matched quantification (b; mean  $\pm$  s.e.m. from n=100 cells across two conditions, ns = not significant, t-test).

|             |                |    |
|-------------|----------------|----|
| HT-BFP      | 3 hr vs 24 hr  | ns |
|             | 3 hr vs 48 hr  | ns |
|             | 24 hr vs 48 hr | ns |
| HT-HER2-GFP | 3 hr vs 24 hr  | ns |
|             | 3 hr vs 48 hr  | ns |
|             | 24 hr vs 48 hr | ns |
| Phagocyte   | 3 hr vs 24 hr  | ns |
|             | 3 hr vs 48 hr  | ns |
|             | 24 hr vs 48 hr | ns |

|       |                           |      |
|-------|---------------------------|------|
| 3 hr  | HT-BFP vs. HT-HER2-GFP    | **   |
|       | HT-BFP vs. Phagocyte      | ***  |
|       | HT-HER2-GFP vs. Phagocyte | ns   |
| 24 hr | HT-BFP vs. HT-HER2-GFP    | **   |
|       | HT-BFP vs. Phagocyte      | **** |
|       | HT-HER2-GFP vs. Phagocyte | ns   |
| 48 hr | HT-BFP vs. HT-HER2-GFP    | ns   |
|       | HT-BFP vs. Phagocyte      | ***  |
|       | HT-HER2-GFP vs. Phagocyte | **   |

**Supplementary Table 1: Results of statistical tests for values reported in Fig. 5 e and f.** ANOVA test with Tukey post-hoc test was used, ns: not significant, \*\*:  $p < 0.01$ , \*\*\*:  $p < 0.001$ , \*\*\*\*:  $p < 0.0001$ .
